# Supplementary material for: Dissolution, regeneration and characterisation of formic acid and Alcell lignin in ionic liquid-based systems
Source: Royal Society of Chemistry journal article supplement (doi:10.1039/c3ra46278a), 2013-11-26
Supplement: c3ra46278a.pdf [file c3ra46278a.pdf]

## Electronic Supplementary Information

### Dissolution, regeneration and characterisation of formic acid and Alcell lignin in ionic liquid-based systems

Yong-Chang Sun,<sup>a</sup> Ji-Kun Xu,<sup>a</sup> Feng Xu,<sup>a</sup> Run-Cang Sun<sup>\*a,b</sup> and Gwynn Lloyd Jones<sup>c</sup>

<sup>a</sup>Beijing Key Laboratory of Lignocellulosic Chemistry, Beijing Forestry University, Beijing 100083, China.

<sup>b</sup>State Key Laboratory of Pulp and Paper Engineering, South China University of Technology, Guangzhou 510640, China.

<sup>c</sup>University of Wales, Biocomposites Centre, Bangor LL57 2UW, Gwynedd, Wales, UK

\*To whom correspondence should be addressed. E-mail: rcsun3@bjfu.edu.cn, Tel: +86 10 62336903; Fax: +86 10 62336903

#### Contents of the supplementary information:

|                   | Content                                                                                                                                                                                                                                                                                | Page |
|-------------------|----------------------------------------------------------------------------------------------------------------------------------------------------------------------------------------------------------------------------------------------------------------------------------------|------|
| <b>Fig. S1</b>    | Schematic of various lignin components (a) H-type lignin, (b) G-type lignin and (c) S-type lignin.                                                                                                                                                                                     | S2   |
| <b>Fig. S2</b>    | Ionic liquids used in the experiments (a) [bmim]Cl; (b) [bmim][HSO <sub>4</sub> ]; (c) [emim][OAc]; (d) [bmim][BF <sub>4</sub> ].                                                                                                                                                      | S2   |
| <b>Fig. S3</b>    | The procedure for lignin dissolved in ILs-water systems with water as precipitating solvent.                                                                                                                                                                                           | S3   |
| <b>Fig. S4</b>    | The procedure for lignin successively regenerated in ethanol-water mixture (RL1) and water (RL2).                                                                                                                                                                                      | S3   |
| <b>Fig. S5</b>    | Molecular weight distribution of lignin: (a) bamboo lignin; (b) Re-lignin (entry 7, 180 °C); (c) eucalyptus lignin; and (d) Re-lignin (entry 20, 180 °C).                                                                                                                              | S4   |
| <b>Fig. S6</b>    | FT-IR spectra of (a): curves of a, b, c, and d represent the lignin of entries 4, 7, 9, and original bamboo lignin (FAL), respectively. (b) curves of e, f, g, and h represent the lignin of entries 20, 19, 17, and original eucalyptus lignin (AL) respectively as shown in Table 1. | S6   |
| <b>Table S1</b>   | The molecular weight of the THF-soluble compound and the regenerated lignin after treated with [emim][OAc]-water mixtures, corresponding to the lignin in Fig. 3.                                                                                                                      | S6   |
| <b>Table S2</b>   | Assignment of main lignin <sup>1</sup> H- <sup>13</sup> C cross-signals in the HSQC spectra of the lignin fractions.                                                                                                                                                                   | S7   |
| <b>Scheme S1</b>  | Chemical degradation of β-O-4' linkage under acidic conditions. <sup>1</sup>                                                                                                                                                                                                           | S8   |
| <b>References</b> |                                                                                                                                                                                                                                                                                        | S8   |

### Three phenylpropanoid monomers of lignin

Lignin is rich in benzene rings, and the lignin aromatic moieties can be classified into three types: syringyl (S), guaiacyl (G), and *p*-hydroxyphenyl (H) units.

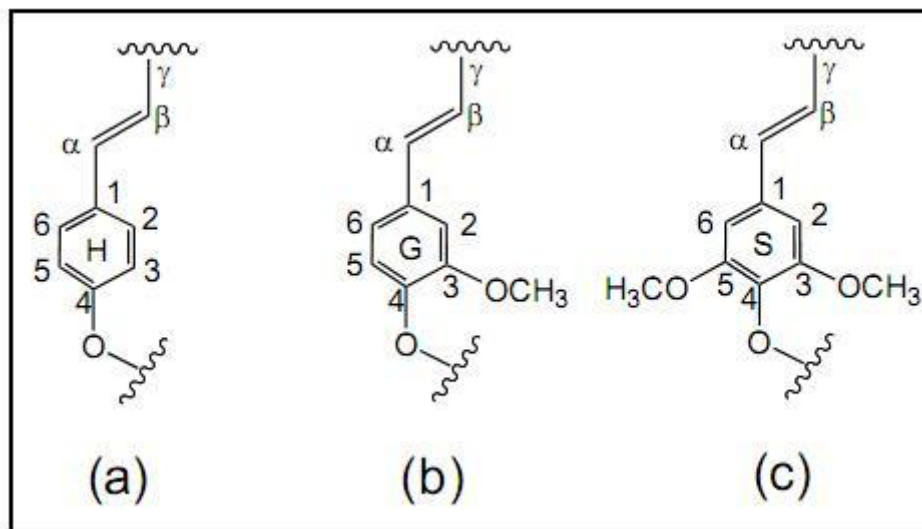

**Fig. S1** Schematic of various lignin components (a) H-type lignin, (b) G-type lignin and (c) S-type lignin.

### Ionic liquids (ILs)

ILs used in this study including 1-butyl-3-methylimidazolium chloride ([bmim]Cl), 1-ethyl-3-methylimidazolium acetate ([emim][OAc]), 1-butyl-3-methylimidazolium hydrogen sulfate ([bmim][HSO<sub>4</sub>]), and 1-butyl-3-methylimidazolium tetrafluoroborate ([bmim][BF<sub>4</sub>]).

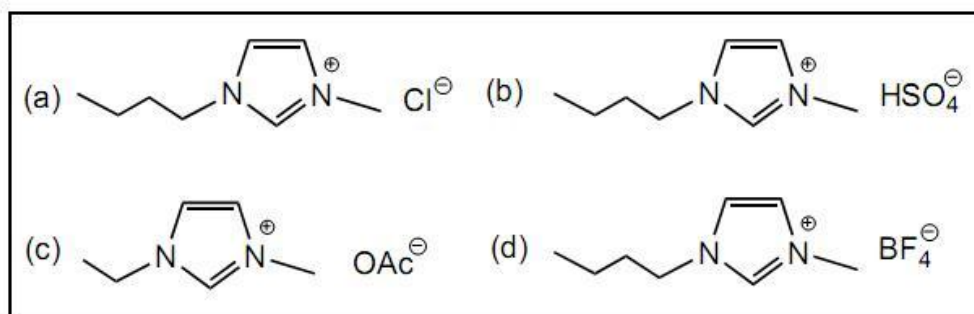

**Fig. S2** Ionic liquids used in the experiments (a) [bmim]Cl; (b) [bmim][HSO<sub>4</sub>]; (c) [emim][OAc]; and (d) [bmim][BF<sub>4</sub>].

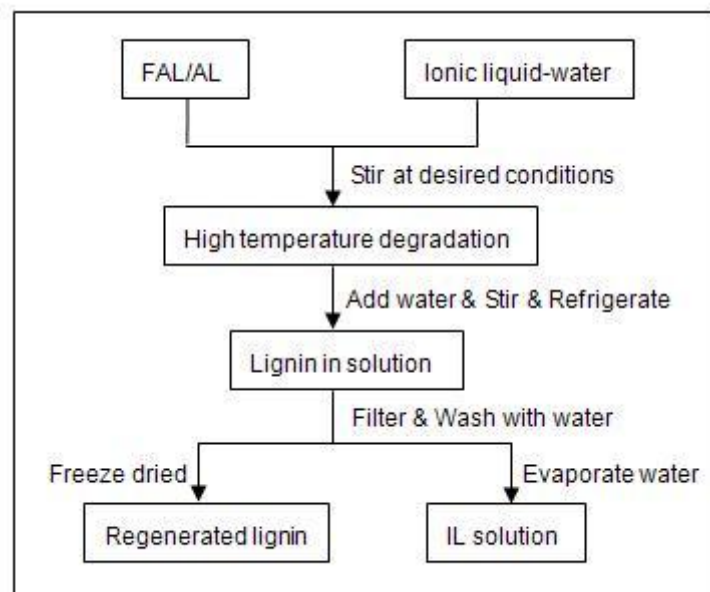

**Fig. S3** The procedure for lignin dissolved in ILs-water systems with water as precipitating solvent.

Lignin was precipitated in two parts: first part, lignin regenerated with different proportions of ethanol-water mixtures; second part, lignin regenerated with water.

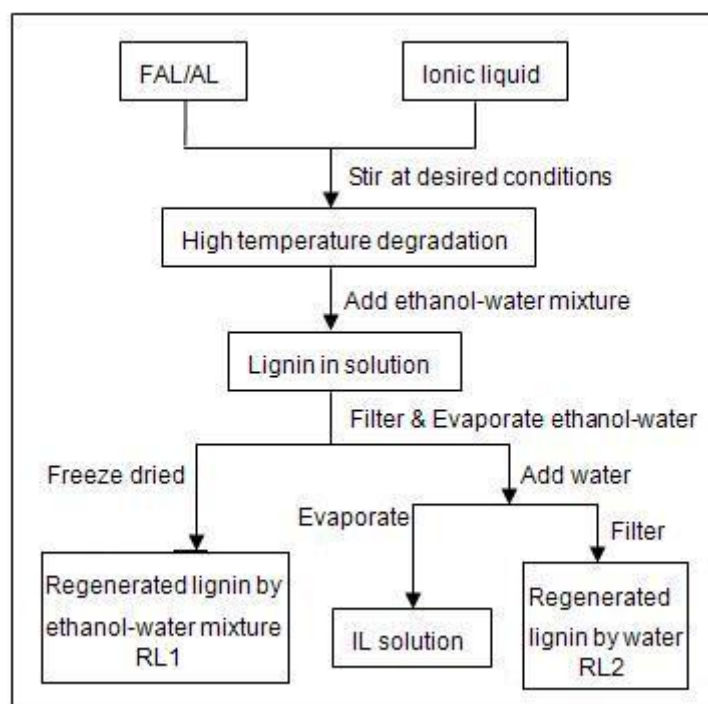

**Fig. S4** The procedure for lignin successively regenerated in ethanol-water mixture (RL1) and water (RL2).

### Molecular weight distribution of the FAL, AL and Re-lignin

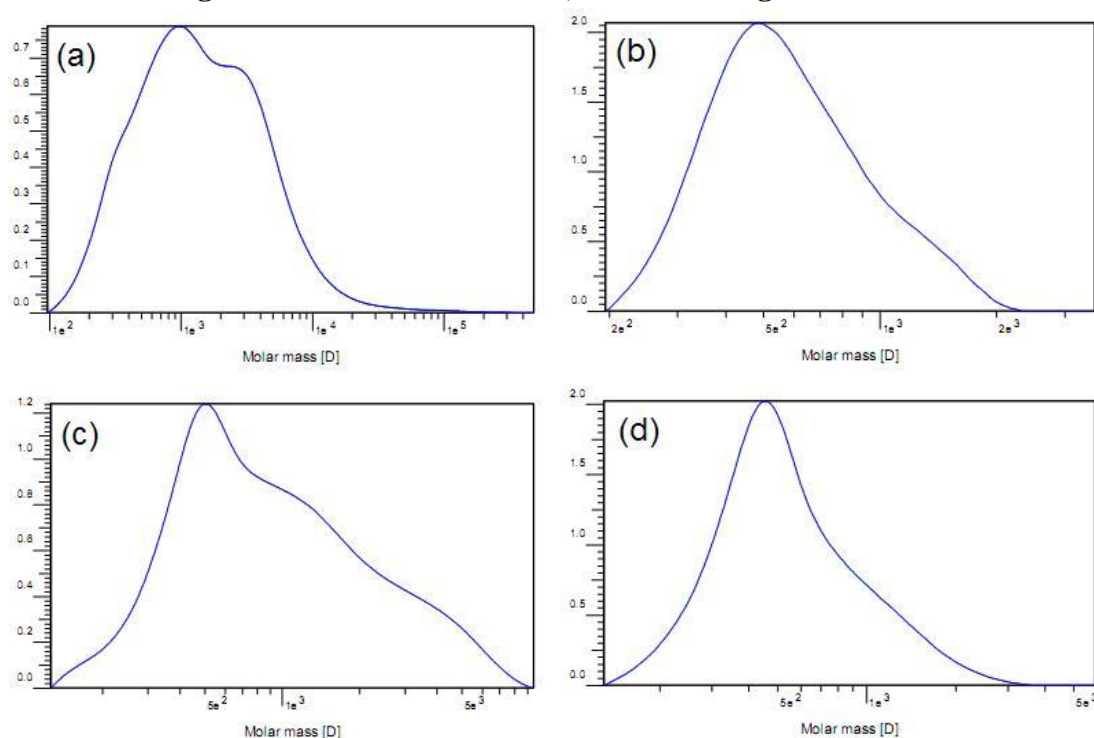

**Fig. S5** Molecular weight distribution of lignin: (a) original bamboo lignin (FAL); (b) Re-lignin (entry 7, 180 °C); (c) original eucalyptus lignin (AL); and (d) Re-lignin (entry 20, 180 °C).

### FT-IR analysis

Fig. S6 shows the FT-IR spectra of original lignin and regenerated lignin from bamboo and eucalyptus. A number of bands were used to monitor the chemical changes that occurred in lignin regeneration process. Generally, the main differences of the lignin existed at wave numbers lower than  $1900\text{ cm}^{-1}$ . As shown in Fig. S6a, the raw bamboo lignin fraction (FAL, curve d) exhibited a wide and high absorption band at  $1720\text{ cm}^{-1}$ , which is assigned to C=O stretching of unconjugated ketone, carbonyl, and ester groups. The reduced signals of this band in curves a, b, and c indicated that the lignin structure changed after ILs dissolving and regeneration process at  $120\text{--}180\text{ °C}$ . The C=O groups might disappear or might also react at the C2 position of the imidazolium in ILs.<sup>2,3</sup> The water regenerated lignin (curves 4 and 7) showed shifted peaks ( $1731$  and  $1561\text{ cm}^{-1}$ ) as compared to the FAL fraction ( $1720$  and  $1591\text{ cm}^{-1}$ ). It is probably related to the influence of some groups formed in this process, which could affect the infrared absorption. The peaks at  $1591$ ,  $1507$ , and  $835\text{ cm}^{-1}$  are assigned to the characteristic stretching of structural benzene ring in lignin.<sup>4</sup> The absorption bands at  $1458$  and  $1421\text{ cm}^{-1}$  corresponds to the vibration of the asymmetric bending in C-H deformation of methyl and methylene groups and aromatic skeletal vibrations combined with C-H in-plane deformation; the S unit breathing with C=O stretching and G rings breathing with carbonyl stretching appears at  $1323$  and  $1262\text{ cm}^{-1}$ , respectively. The spectrum of Re-lignin at  $180\text{ °C}$  (curve b) shows a relatively high absorption band at  $1262\text{ cm}^{-1}$  as compared with the other

spectra, indicating more condensed G unit existed in the regenerated lignin. The wide bands at 1217 and 1116  $\text{cm}^{-1}$  are due to the C-C, C-O, and C=O stretching and aromatic C-H deformation in S ring, respectively. The presence of a small band at 1168  $\text{cm}^{-1}$  in all spectra is typical of the *p*-hydroxyphenyl structures of bamboo lignin. In addition, the absorption bands at 1030 and 853  $\text{cm}^{-1}$  are considered to be the aromatic C-H in-plane and out-of-plane deformation of aromatic rings, respectively. All these bands indicated that the Re-lignin displayed a similar infrared absorption bands as that of original lignin. It is believed that all the lignin fractions are GSH-type lignin, while the different characteristic absorptions probably occurred in the side chain of lignin.

The FT-IR spectra of AL fractions regenerated from ILs are shown in Fig. S6b. The characteristic absorbance for aromatic skeleton vibration observed was relatively weak in Re-lignin obtained at 180 °C (curve e), indicating that the lignin experienced a large content of decomposition during dissolving and regeneration process. The band at 1700  $\text{cm}^{-1}$  corresponds to conjugated carbonyl groups, while this band seems almost disappeared in curves e and f. It can be concluded that high reaction temperature could decrease the content of conjugated carbonyl groups and increase the unconjugated carbonyl groups during the IL dissolving process. Different S : G ratios has been reported in hardwood and dicotyl crops. As illustrated in Fig. S6b, the intensive ratio of 1510 to 1459  $\text{cm}^{-1}$  decreased from curves h to g, to f, and to e, indicating that less content of S-type lignin produced as the reaction temperature increased in the [emim][OAc] solution. In addition, the band corresponding to the vibration of aromatic C-H and C-O in aliphatic alcohols, at 1028  $\text{cm}^{-1}$ , is more intensive in original lignin (curve h) than in lignin (curves g, f, and e) regenerated in [emim][OAc]. This may be owing to the higher amount of aromatic C-H in guaiacyl rings, with three free positions in the ring, than in syringyl rings, with only two free positions.

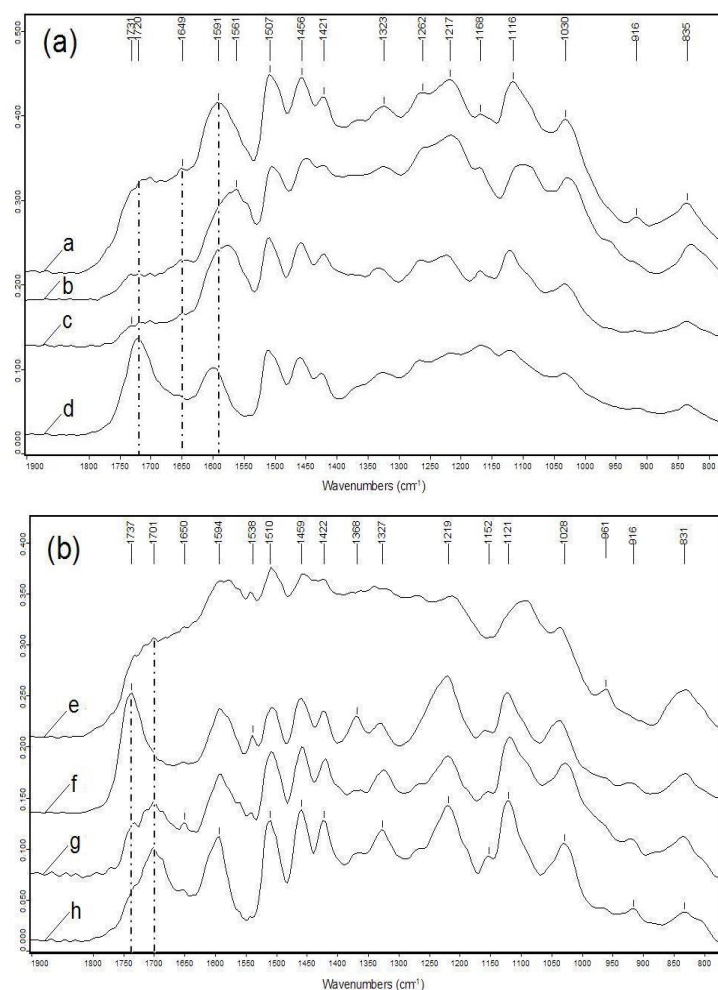

**Fig. S6** FT-IR spectra of (a): curves of a, b, c, and d represent the lignin of entries 4, 7, 9, and original bamboo lignin (FAL), respectively. (b) curves of e, f, g, and h represent the lignin of entries 20, 19, 17, and original eucalyptus lignin (AL) respectively as shown in Table 1.

**Table S1** The molecular weight of the THF-soluble compound and the regenerated lignin after treated with [emim][OAc]-water mixtures, corresponding to the lignin in Fig. 3.

| Treatment condition              | Lignin | Molecular weight                       |       |      |                    |       |      |
|----------------------------------|--------|----------------------------------------|-------|------|--------------------|-------|------|
|                                  |        | THF-soluble lignin in ILs <sup>b</sup> |       |      | Regenerated lignin |       |      |
|                                  |        | $M_w$                                  | $M_n$ | PI   | $M_w$              | $M_n$ | PI   |
| IL-water                         | FAL    | 560                                    | 490   | 1.14 | 880                | 660   | 1.33 |
| 5% [emim][OAc]:H <sub>2</sub> O  | FAL    | 570                                    | 490   | 1.16 | 860                | 650   | 1.32 |
| 15% [emim][OAc]:H <sub>2</sub> O | FAL    | 600                                    | 510   | 1.17 | 670                | 550   | 1.22 |
| 35% [emim][OAc]:H <sub>2</sub> O | FAL    | 580                                    | 500   | 1.16 | 630                | 510   | 1.24 |
| 50% [emim][OAc]:H <sub>2</sub> O | FAL    | 790                                    | 580   | 1.37 | 680                | 540   | 1.26 |
| 65% [emim][OAc]:H <sub>2</sub> O | FAL    | 650                                    | 530   | 1.23 | 860                | 530   | 1.62 |
| 85% [emim][OAc]:H <sub>2</sub> O | FAL    | 580                                    | 520   | 1.12 | 970                | 680   | 1.43 |
| 100% [emim][OAc]                 | FAL    |                                        |       |      |                    |       |      |

**Table S2** Assignment of main lignin  $^1\text{H}$ - $^{13}\text{C}$  cross-signals in the HSQC spectra of the lignin fractions.

| Labels                             | $\delta_{\text{H}}/\delta_{\text{C}}$ (ppm) | Assignment                                                                                                                              |
|------------------------------------|---------------------------------------------|-----------------------------------------------------------------------------------------------------------------------------------------|
| $\text{D}_{\beta}$                 | 2.85/                                       | $\text{H}_{\beta}\text{-C}_{\beta}$ in $\beta$ -1' (spirodienone) substructures ( <b>D</b> )                                            |
| $\text{B}_{\beta}$                 | 3.06/53.4                                   | $\text{H}_{\beta}\text{-C}_{\beta}$ in $\beta$ - $\beta'$ (resinol) substructures ( <b>B</b> )                                          |
| $\text{C}_{\beta}$                 | 3.48/53.2                                   | $\text{H}_{\beta}\text{-C}_{\beta}$ in $\beta$ -5' (phenylcoumaran) substructures ( <b>C</b> )                                          |
| -OMe                               | 3.73/55.6                                   | H-C in methoxyls                                                                                                                        |
| $\text{A}_{\gamma}$                | 3.40/3.71/60.1                              | $\text{H}_{\gamma}\text{-C}_{\gamma}$ in $\beta$ -O-4' substructures ( <b>A</b> )                                                       |
| $(\text{A}', \text{A}'')_{\gamma}$ | 4.10/63.5                                   | $\text{H}_{\gamma}\text{-C}_{\gamma}$ in $\gamma$ -acetylated $\beta$ -O-4' substructures ( <b>A'</b> / <b>A''</b> )                    |
| $\text{B}_{\gamma}$                | 4.17/71.6 and 3.80/71.6                     | $\text{H}_{\gamma}\text{-C}_{\gamma}$ in $\beta$ - $\beta'$ (resinol) substructures ( <b>B</b> )                                        |
| $\text{A}_{\alpha}$                | 4.87/71.8                                   | $\text{H}_{\alpha}\text{-C}_{\alpha}$ in $\beta$ -O-4' substructures linked to a S unit ( <b>A/A'/A''</b> )                             |
| $\text{C}_{\gamma}$                | 3.42/63.0                                   | $\text{H}_{\gamma}\text{-C}_{\gamma}$ in $\beta$ -5' (phenylcoumaran) substructures ( <b>C</b> )                                        |
| $\text{I}_{\gamma}$                | 4.09/61.2                                   | $\text{H}_{\gamma}\text{-C}_{\gamma}$ in <i>p</i> -hydroxycinnamyl alcohol end groups ( <b>I</b> )                                      |
| $\text{B}_{\alpha}$                | 4.65/84.9                                   | $\text{H}_{\alpha}\text{-C}_{\alpha}$ in $\beta$ - $\beta'$ (resinol) substructures ( <b>B</b> )                                        |
| $\text{A}_{\beta(\text{S})}$       | 4.12/85.7                                   | $\text{H}_{\beta}\text{-C}_{\beta}$ in $\beta$ -O-4' substructures linked to a S unit ( <b>A</b> )                                      |
| $\text{A}_{\beta(\text{G/H})}$     | 4.31/83.3                                   | $\text{H}_{\beta}\text{-C}_{\beta}$ in $\beta$ -O-4' substructures linked to a G and H units ( <b>A</b> )                               |
| $\text{D}_{\alpha}$                | 4.76/81.4                                   | $\text{H}_{\alpha}\text{-C}_{\alpha}$ in $\beta$ -1' (spirodienone) substructures ( <b>D</b> )                                          |
| $\text{C}_{\alpha}$                | 5.48/86.7                                   | $\text{H}_{\alpha}\text{-C}_{\alpha}$ in $\beta$ -5' (phenylcoumaran) substructures ( <b>C</b> )                                        |
| $\text{PCE}_8$                     | 6.26/113.6                                  | $\text{H}_8\text{-C}_8$ in <i>p</i> -coumarate ( <b>PCE</b> )                                                                           |
| $\text{S}_{2,6}$                   | 6.66/103.7 and 6.47/106.7                   | $\text{H}_{2,6}\text{-C}_{2,6}$ in syringyl units ( <b>S</b> )                                                                          |
| $\text{S}'_{2,6}$                  | 7.31/106.2                                  | $\text{H}_{2,6}\text{-C}_{2,6}$ in $\text{C}_{\alpha}$ -oxidized ( $\text{C}_{\alpha}=\text{O}$ ) phenolic syringyl units ( <b>S'</b> ) |
| $\text{G}_2$                       | 6.93/110.3                                  | $\text{H}_2\text{-C}_2$ in guaiacyl units ( <b>G</b> )                                                                                  |
| $\text{G}_5$                       | 6.68/114.9                                  | $\text{H}_5\text{-C}_5$ in guaiacyl units ( <b>G</b> )                                                                                  |
| $\text{G}_6$                       | 6.78/118.4                                  | $\text{H}_6\text{-C}_6$ in guaiacyl units ( <b>G</b> )                                                                                  |
| $\text{H}_{2,6}$                   | 6.98/130.2 and 6.92/128.1                   | $\text{H}_{2,6}\text{-C}_{2,6}$ in <i>p</i> -hydroxyphenyl units ( <b>H</b> )                                                           |
| $\text{I}_{\alpha}$                | 6.33/130.2                                  | $\text{H}_{\alpha}\text{-C}_{\alpha}$ in <i>p</i> -hydroxycinnamyl alcohol end groups ( <b>I</b> )                                      |
| $\text{PCE}_{3,5}$                 | 7.11/122.9                                  | $\text{H}_{3,5}\text{-C}_{3,5}$ in <i>p</i> -coumarate ( <b>PCE</b> )                                                                   |
| $\text{PCE}_{2,6}$                 | 7.49/129.9                                  | $\text{H}_{2,6}\text{-C}_{2,6}$ in <i>p</i> -coumarate ( <b>PCE</b> )                                                                   |



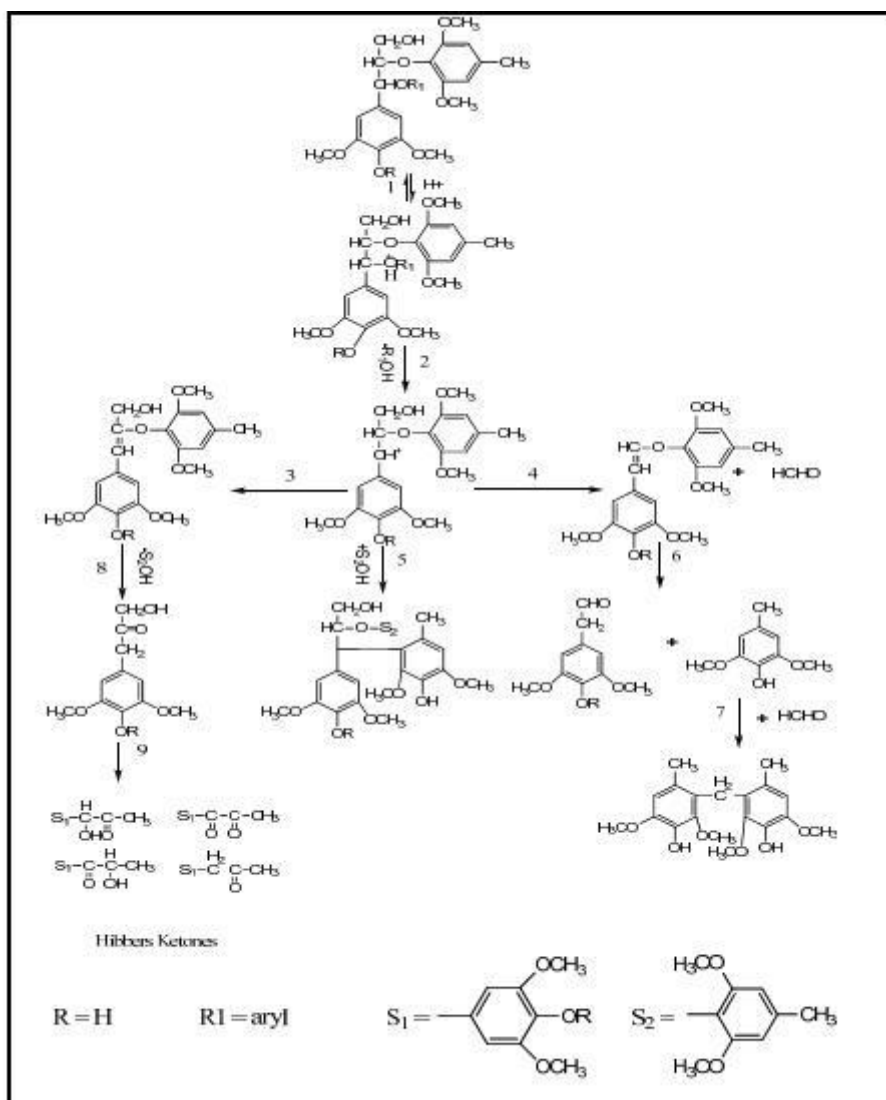

**Scheme S1** Chemical degradation of  $\beta$ -O-4' linkage under acidic conditions.<sup>4</sup>

## References

1. A. Sakakibara and Y. Sano, in *Wood and Cellulosic Chemistry*, ed. D. N. S. Hon and N. Shiraishi, Marcel Dekker, New York, 2001, pp. 109-174.
2. H. Zhao, C. L. Jones, G. A. Baker, S. Xia, O. Olubajo and V. N. Person, *J. Biotechnol.*, 2009, **139**, 47-54.
3. S. T. Handy and M. Okello, *J. Org. Chem.*, 2005, **70**, 1915-1918.
4. J. Long, X. Li, B. Guo, F. Wang, Y. Yu and L. Wang, *Green Chem.*, 2012, **14**, 1935-1941.
